# Supplementary material
Source: publisher site journal article supplement (https://www.dovepress.com/article/583766)
Supplement: Supplementary file 1 [file 583766_Supplementary Tables document.pdf › 583766_Supplementary Tables document.pdf]

## Supplementary Table 1: STROBE Checklist for Cross-Sectional Studies

(Adapted from Von Elm et al.<sup>33</sup>)

| Items | Section / Topic            | Recommendation                                             | Location in Manuscript                        |
|-------|----------------------------|------------------------------------------------------------|-----------------------------------------------|
| 1     | Title & Abstract           | Indicate study design and summarize findings               | Title page; Abstract                          |
| 2     | Background / Rationale     | Explain scientific background and rationale                | Introduction, ¶1–2                            |
| 3     | Objectives                 | State specific objectives, including hypotheses            | Introduction, final paragraph                 |
| 4     | Study Design               | Present key design elements early                          | Methods, “Design and Setting”                 |
| 5     | Setting                    | Describe setting, locations, dates, and relevant periods   | Methods, “Setting”                            |
| 6     | Participants               | Eligibility criteria and recruitment methods               | Methods, “Participants and Recruitment”       |
| 7     | Variables                  | Clearly define outcomes, exposures, confounders            | Methods, “Variables and Definitions”          |
| 8     | Data Sources / Measurement | Describe data collection methods and validity              | Methods, “Survey Instrument”                  |
| 9     | Bias                       | Describe efforts to address bias                           | Methods, “Bias Control”                       |
| 10    | Study Size                 | Explain sample size determination                          | Methods, “Sample-Size Justification”          |
| 11    | Quantitative Variables     | Explain handling of quantitative variables                 | Methods, “Variables and Statistical Analysis” |
| 12    | Statistical Methods        | Describe statistical methods, including confounder control | Methods, “Data Analysis”                      |
| 13    | Participants (Results)     | Report numbers at each stage of study                      | Results, “Participant Flow”                   |
| 14    | Descriptive Data           | Characteristics of participants                            | Results, Table 1                              |
| 15    | Outcome Data               | Report main outcomes with measures of precision            | Results, Tables 2–6                           |
| 16    | Main Results               | Report unadjusted and adjusted estimates                   | Results, Tables 2–6                           |
| 17    | Other Analyses             | Subgroup/interaction/sensitivity analyses                  | Results, “Predictors of Referral”             |
| 18    | Key Results                | Summarize key results with reference to objectives         | Discussion, “Principal Findings”              |
| 19    | Limitations                | Discuss limitations and potential bias                     | Discussion, “Strengths and Limitations”       |
| 20    | Interpretation             | Cautious interpretation consistent with results            | Discussion, “Interpretation and Implications” |
| 21    | Generalizability           | Discuss external validity of results                       | Discussion, “Implications”                    |
| 22    | Funding                    | State funding source and role of funder                    | No external research funding received.        |

**Footnote:** ¶ Paragraph number(s) within the specified manuscript section where the STROBE item is addressed.

**Abbreviations:** STROBE, Strengthening the Reporting of Observational Studies in Epidemiology; APC, article processing charge; HRCE, Health Research Center of Excellence; PSMMC, Prince Sultan Military Medical City.

## Supplementary Table 2: CHERRIES Checklist for Web-Based Surveys

(Adapted from Eysenbach G.<sup>34</sup>)

| Items | Domain                                       | Description                                                                                       | Location in Manuscript                              |
|-------|----------------------------------------------|---------------------------------------------------------------------------------------------------|-----------------------------------------------------|
| 1     | Survey Design                                | Type of study and objectives clearly stated                                                       | Abstract; Methods                                   |
| 2     | Ethics & IRB                                 | IRB approvals listed; informed consent obtained                                                   | Methods, "Ethics"                                   |
| 3     | Development & Pre-testing                    | Questionnaire validated and pilot tested                                                          | Methods, "Survey Instrument"                        |
| 4     | Recruitment                                  | Recruitment methods and inclusion criteria described                                              | Methods, "Participants and Recruitment"             |
| 5     | Response Rate                                | Number of complete vs partial responses; completion rate reported                                 | Results, "Participant Flow"                         |
| 6     | Preventing Multiple Entries Survey Integrity | Post-hoc screening for duplicate timestamps and inconsistent responses; no evidence of duplicates | Methods – Data Quality and Bias Control             |
| 7     | Incentives                                   | None offered                                                                                      | Methods                                             |
| 8     | Data Protection                              | Secure server, password protection, anonymity assured                                             | Methods, "Ethical Considerations"                   |
| 9     | Handling of Incomplete Questionnaires        | Partial data excluded                                                                             | Methods, "Bias Control"                             |
| 10    | Analysis                                     | Statistical methods fully described                                                               | Methods, "Data Analysis"                            |
| 11    | Technical Details                            | Platform (Google Forms) identified; format and duration stated                                    | Methods, "Data Quality and Bias Control"            |
| 12    | Results Reporting                            | Participation flow and key outcomes reported                                                      | Results, "Participant Flow"                         |
| 13    | Discussion of Bias                           | Coverage and self-selection bias acknowledged                                                     | Discussion, "Limitations"                           |
| 14    | Accessibility of Instrument                  | Survey and checklist available as appendices                                                      | Supplementary Figure 1 and Supplementary Tables 1–2 |

**Abbreviations:** CHERRIES, Checklist for Reporting Results of Internet E-Surveys; IRB, Institutional Review Board.
