# Supplementary material
Source: publisher site journal article supplement (https://www.dovepress.com/article/583766)
Supplement: Supplementary file 2 [file 583766_Supplemtary Figure_1.pdf › 583766_Supplemtary Figure_1.pdf]

## Supplementary Figure 1: Survey Instrument

### Referral Practices for Musculoskeletal (MSK) Conditions: A Primary Care Physician Survey

Principal Investigator: Ms. Norah Ali AlMuhana | Co-Investigators: Dr. Hana Alsobayel, Dr. Dalia Alimam

IRB Approval No.: E-25-9743

Dear Doctor, this questionnaire aims to investigate current referral practices for musculoskeletal (MSK) conditions to physiotherapy. Your responses will help identify challenges, improve referral systems, and optimize care pathways. Your participation is entirely voluntary, anonymous, and confidential. The survey will take approximately 7–10 minutes to complete.

#### SECTION 1: Consent & Eligibility Screening

##### Q1. Do you agree to participate in this study? \*

Mark only one.

- ☐ Yes
- ☐ No → Skip to end (Thank You)

##### Q2. Are you a family medicine physician currently practicing in Saudi Arabia? \*

Mark only one.

- ☐ Yes
- ☐ No → Skip to end (Thank You)

#### SECTION 2: Demographic Information

##### Q3. What is your gender? \*

Mark only one.

- ☐ Male
- ☐ Female

##### Q4. What is your nationality? \*

Mark only one.

- ☐ Saudi
- ☐ Non-Saudi

##### Q5. What is your current professional rank? \*

Mark only one.

- ☐ Consultant
- ☐ Senior Registrar
- ☐ Registrar
- ☐ Resident
- ☐ Other: \_\_\_\_\_

##### Q6. How many years have you been in practice? \*

Mark only one.

- ☐ < 1 year
- ☐ 1–5 years
- ☐ 6–10 years
- ☐ 11–20 years
- ☐ > 20 years

##### Q7. In what type of healthcare setting do you primarily work? \*

Mark only one.

- ☐ Ministry of Health (MOH)
- ☐ Private sector
- ☐ Military Hospital
- ☐ University Hospital
- ☐ Other: \_\_\_\_\_

##### Q8. On average, how many patients with MSK conditions are scheduled per day in your clinic? \*

Mark only one.

- ☐ None
- ☐ 1–2 patients
- ☐ 3–5 patients

- > 5 patients

### SECTION 3: Knowledge — Awareness and Use of Clinical Decision Tools

#### *Assesses awareness, familiarity, and exposure to MSK tools and referral systems*

**Q9. Are you familiar with clinical tools used to support decision-making in MSK care? \***

*Mark only one.*

- Not familiar at all → Skip to Q12
- Aware, but do not use → Skip to Q12
- Occasionally use
- Regularly use

**Q10. If you use any clinical tool, which one(s) do you use when making MSK care decisions? \***

*Select all that apply.*

- ☐ Keele STarT MSK Tool
- ☐ STarT Back Screening Tool
- ☐ Visual Analog Scale (VAS)
- ☐ Oswestry Disability Index (ODI)
- ☐ A self-developed or locally adapted tool
- ☐ Not sure of the name
- ☐ Other: \_\_\_\_\_

**Q11. What barriers prevent the use of clinical tools in your practice? \***

*Select all that apply.*

- ☐ Lack of training
- ☐ Lack of time
- ☐ No institutional guidelines
- ☐ Belief that tools are not useful
- ☐ Not integrated in electronic medical records
- ☐ Other: \_\_\_\_\_

### SECTION 4: Attitudes — Perceptions and Satisfaction with the Referral System

#### *Perceptions, satisfaction, and beliefs about the current referral system*

**Q12. How satisfied are you with the current system for referring patients to physiotherapy? \***

*Mark only one.*

- Very satisfied
- Satisfied
- Neutral
- Dissatisfied
- Very dissatisfied

**Q13. How satisfied are you with the referral system for MSK specialized clinics (orthopedic, rheumatology, spinal, pain management, radiology)? \***

*Mark only one.*

- Very satisfied
- Satisfied
- Neutral
- Dissatisfied
- Very dissatisfied

**Q14. Do you believe the referral system adequately meets patient needs? \***

*Mark only one.*

- Never
- Rarely
- Sometimes
- Often
- Always

**Q15. How would you rate the communication between primary care physicians and specialists? \***

*Mark only one.*

- ☐ Poor
- ☐ Needs improvement
- ☐ Adequate
- ☐ Excellent

## **SECTION 5: Practice — Referral Behaviors and Influencing Factors**

### ***Actual referral behaviors and factors influencing referral decisions***

**Q16. How often do you refer patients with MSK conditions to physiotherapy? \***

*Mark only one.*

- ☐ Rarely < 10% of cases
- ☐ Sometimes 10–30% of cases
- ☐ Often 31–60% of cases
- ☐ Very often > 60% of cases

**Q17. How often do you refer patients with MSK conditions to specialized clinics (e.g., orthopedic, rheumatology, spinal, pain management)? \***

*Mark only one.*

- ☐ Rarely < 10% of cases
- ☐ Sometimes 10–30% of cases
- ☐ Often 31–60% of cases
- ☐ Very often > 60% of cases

**Q18. How often do you refer patients with MSK conditions to radiology (e.g., X-ray, MRI)? \***

*Mark only one.*

- ☐ Rarely < 10% of cases
- ☐ Sometimes 10–30% of cases
- ☐ Often 31–60% of cases
- ☐ Very often > 60% of cases

**Q19. What are the most common reasons for referral to physiotherapy? \***

*Select all that apply.*

- ☐ Severe pain
- ☐ Chronic pain
- ☐ Functional limitations
- ☐ Poor response to treatment
- ☐ Patient request
- ☐ Other: \_\_\_\_\_

**Q20. What factors might influence your decision to refer a patient with MSK conditions to physiotherapy? \***

*Select all that apply.*

- ☐ Patient preference
- ☐ Availability of physiotherapy services
- ☐ Severity of the condition
- ☐ Insurance coverage / reimbursement issues
- ☐ Familiarity with physiotherapy benefits
- ☐ Other: \_\_\_\_\_

**Q21. Do you use any tools or guidelines to decide when and where to refer patients with MSK conditions? \***

*Mark only one.*

- ☐ Yes
- ☐ No

**Q22. What are the biggest challenges in the current referral system? \***

*Select all that apply.*

- ☐ Long waiting times for specialist or physiotherapy appointments

- ☐ Limited access to certain MSK services in your region
- ☐ Insurance or cost-related issues
- ☐ Lack of clear referral guidelines or digital pathways
- ☐ Patient reluctance or low compliance with referral
- ☐ Other: \_\_\_\_\_

**Q23. In your opinion, what improvements could be made to enhance the referral process or clinical decision-making for MSK conditions in your practice setting? \***

*Open-ended response.*

---

## **SECTION 6: Contact (Optional)**

**Q24. Would you be willing to be contacted for follow-up questions or clarification?**

*Mark only one.*

- ☐ Yes
- ☐ No

**Q25. If yes, please provide your name and email address (optional).**

*Open-ended response — voluntary and confidential.*

---

*\* Required question. All responses are anonymous and confidential. Data will be used for academic and research purposes only.*

**Abbreviations:** MSK, musculoskeletal; IRB, Institutional Review Board; VAS, Visual Analog Scale; ODI, Oswestry Disability

*Index.*
